# Supplementary material for: Second-Generation Antipsychotic Use Among Stimulant-Using Children, by Organization of Medicaid Mental Health
Source: Atypon-hosted journal article supplement (doi:10.1176/appi.ps.201300574), 2014-12-01
Supplement: appi.ps.201300574.ds001.pdf [file appi.ps.201300574.ds001.pdf]

## APPENDIX FOR READERS AND REVIEWERS

This Appendix provides additional tables to aid in the interpretation of “**Second-Generation Antipsychotic Use Among Stimulant-Using Children, by Organization of Medicaid Mental Health**”

The supplementary tables in this appendix are:

- **Unconditional Logistic Regression Estimates of Antipsychotic Use**  
These tables do not condition on use of stimulants (they are estimated using all observations in the sample)
- **Poisson Regression Estimates of Antipsychotic Use**  
These regressions emulate the main study regressions, but use a Poisson specification instead of logistic regression.
- **Main Logistic Regression Models Reweighting to Give Each County a Weight=1**  
These regressions emulate the main study regressions, but the total number of observations in each county are reweighted so that each county has equal weight.
- **Main Logistic Regression Models Restricting to 2008 Years**  
These regressions emulate the main study regressions, but restrict data to 2008.
- **Main Logistic Regression Models Adjusting for Prior Authorization**  
These regressions emulate the main study regressions, but also include controls for states that a study reviewer indicated implemented prior authorization policies.
- **Demographics of Full Sample (Not Conditioning on Stimulant Use)**  
These tables represent the descriptive characteristics of the full sample.

**Unconditional Logistic Regression Estimates of Antipsychotic Use**

|                     | <b>Odds Ratio</b> | <b>95% Confidence Interval</b> |      | <b>P-Value</b> | <b>Odds Ratio</b> | <b>95% Confidence Interval</b> |      | <b>P-Value</b> |
|---------------------|-------------------|--------------------------------|------|----------------|-------------------|--------------------------------|------|----------------|
| <b>Foster Youth</b> |                   |                                |      |                |                   |                                |      |                |
| Carve-out           | Ref               |                                |      |                | Ref               |                                |      |                |
| Fee-for-Service     | 2.84              | 2.15                           | 3.76 | 0.00           | 2.36              | 1.93                           | 2.88 | 0.00           |
| Integrated          | 1.63              | 1.33                           | 1.99 | 0.00           | 1.97              | 1.57                           | 2.46 | 0.00           |
| <b>SSI</b>          |                   |                                |      |                |                   |                                |      |                |
| Carve-out           | Ref               |                                |      |                | Ref               |                                |      |                |
| Fee-for-Service     | 1.88              | 1.56                           | 2.26 | 0.00           | 1.59              | 1.34                           | 1.90 | 0.00           |
| Integrated          | 1.33              | 1.11                           | 1.59 | 0.00           | 1.45              | 1.18                           | 1.77 | 0.00           |
| <b>TANF</b>         |                   |                                |      |                |                   |                                |      |                |
| Carve-out           | Ref               |                                |      |                | Ref               |                                |      |                |
| Fee-for-Service     | 2.28              | 1.57                           | 3.31 | 0.00           | 1.70              | 1.26                           | 2.29 | 0.00           |
| Integrated          | 1.21              | 0.78                           | 1.87 | 0.40           | 1.10              | 0.67                           | 1.80 | 0.71           |

**Poisson Regression Estimates of Antipsychotic Use**

|                     | <b>Est</b> | <b>95% Confidence Interval</b> |      | <b>P-Value</b> | <b>Est</b> | <b>95% Confidence Interval</b> |      | <b>P-Value</b> |
|---------------------|------------|--------------------------------|------|----------------|------------|--------------------------------|------|----------------|
| <b>Foster Youth</b> |            |                                |      |                |            |                                |      |                |
| Carve-out           | Ref        |                                |      |                | Ref        |                                |      |                |
| Fee-for-Service     | 0.31       | 0.15                           | 0.48 | 0.00           | 0.25       | 0.14                           | 0.36 | 0.00           |
| Integrated          | 0.17       | 0.05                           | 0.29 | 0.01           | 0.31       | 0.14                           | 0.48 | 0.00           |
| <b>SSI</b>          |            |                                |      |                |            |                                |      |                |
| Carve-out           | Ref        |                                |      |                | Ref        |                                |      |                |
| Fee-for-Service     | 0.16       | 0.06                           | 0.27 | 0.00           | 0.16       | 0.05                           | 0.27 | 0.00           |
| Integrated          | 0.11       | 0.01                           | 0.21 | 0.03           | 0.25       | 0.09                           | 0.42 | 0.00           |
| <b>TANF</b>         |            |                                |      |                |            |                                |      |                |
| Carve-out           | Ref        |                                |      |                | Ref        |                                |      |                |
| Fee-for-Service     | 0.08       | -0.12                          | 0.29 | 0.43           | 0.10       | -0.09                          | 0.28 | 0.30           |
| Integrated          | 0.11       | -0.13                          | 0.34 | 0.37           | 0.31       | 0.04                           | 0.59 | 0.02           |

**Main Logistic Regression Models Reweighting to Give Each County a Weight=1**

|                     | 95% Confidence |          |      | <i>P</i> -Value | 95% Confidence |          |      | <i>P</i> -Value |
|---------------------|----------------|----------|------|-----------------|----------------|----------|------|-----------------|
|                     | Est            | Interval |      |                 | Est            | Interval |      |                 |
| <b>Foster Youth</b> |                |          |      |                 |                |          |      |                 |
| Carve-out           | Ref            |          |      |                 | Ref            |          |      |                 |
| Fee-for-Service     | 1.48           | 1.25     | 1.76 | 0.00            | 1.35           | 1.14     | 1.59 | 0.00            |
| Integrated          | 1.22           | 0.98     | 1.50 | 0.07            | 1.34           | 0.98     | 1.82 | 0.07            |
| <b>SSI</b>          |                |          |      |                 |                |          |      |                 |
| Carve-out           | Ref            |          |      |                 | Ref            |          |      |                 |
| Fee-for-Service     | 1.23           | 1.08     | 1.40 | 0.00            | 1.27           | 1.08     | 1.50 | 0.00            |
| Integrated          | 1.25           | 0.99     | 1.57 | 0.07            | 1.53           | 1.17     | 2.00 | 0.00            |
| <b>TANF</b>         |                |          |      |                 |                |          |      |                 |
| Carve-out           | Ref            |          |      |                 | Ref            |          |      |                 |
| Fee-for-Service     | 1.23           | 0.91     | 1.65 | 0.18            | 1.33           | 0.98     | 1.79 | 0.06            |
| Integrated          | 1.21           | 0.92     | 1.59 | 0.18            | 1.61           | 1.14     | 2.28 | 0.01            |

**Main Logistic Regression Models Restricting to 2008 Years**

|                     | 95% Confidence |          |      | <i>P</i> -Value | 95% Confidence |          |      | <i>P</i> -Value |
|---------------------|----------------|----------|------|-----------------|----------------|----------|------|-----------------|
|                     | Est            | Interval |      |                 | Est            | Interval |      |                 |
| <b>Foster Youth</b> |                |          |      |                 |                |          |      |                 |
| Carve-out           | Ref            |          |      |                 | Ref            |          |      |                 |
| Fee-for-Service     | 1.56           | 1.18     | 2.04 | 0.00            | 1.52           | 1.22     | 1.90 | 0.00            |
| Integrated          | 1.20           | 0.98     | 1.47 | 0.07            | 1.56           | 1.15     | 2.11 | 0.00            |
| <b>SSI</b>          |                |          |      |                 |                |          |      |                 |
| Carve-out           | Ref            |          |      |                 | Ref            |          |      |                 |
| Fee-for-Service     | 1.26           | 1.06     | 1.48 | 0.01            | 1.30           | 1.10     | 1.54 | 0.00            |
| Integrated          | 1.20           | 0.99     | 1.46 | 0.06            | 1.51           | 1.14     | 2.00 | 0.00            |
| <b>TANF</b>         |                |          |      |                 |                |          |      |                 |
| Carve-out           | Ref            |          |      |                 | Ref            |          |      |                 |
| Fee-for-Service     | 1.09           | 0.83     | 1.44 | 0.53            | 1.07           | 0.83     | 1.39 | 0.59            |
| Integrated          | 1.09           | 0.80     | 1.48 | 0.59            | 1.32           | 0.92     | 1.91 | 0.13            |

**Main Logistic Regression Models Adjusting for Prior Authorization**

|                     | <b>Est</b> | <b>95% Confidence Interval</b> |      | <b>P-Value</b> | <b>Est</b> | <b>95% Confidence Interval</b> |      | <b>P-Value</b> |
|---------------------|------------|--------------------------------|------|----------------|------------|--------------------------------|------|----------------|
| <b>Foster Youth</b> |            |                                |      |                |            |                                |      |                |
| Carve-out           | Ref        |                                |      |                | Ref        |                                |      |                |
| Fee-for-Service     | 1.54       | 1.23                           | 1.94 | 0.00           | 1.45       | 1.19                           | 1.77 | 0.00           |
| Integrated          | 1.44       | 1.21                           | 1.72 | 0.00           | 1.62       | 1.23                           | 2.14 | 0.00           |
| <b>SSI</b>          |            |                                |      |                |            |                                |      |                |
| Carve-out           | Ref        |                                |      |                | Ref        |                                |      |                |
| Fee-for-Service     | 1.23       | 1.07                           | 1.41 | 0.00           | 1.26       | 1.05                           | 1.52 | 0.01           |
| Integrated          | 1.30       | 1.09                           | 1.55 | 0.00           | 1.47       | 1.11                           | 1.93 | 0.01           |
| <b>TANF</b>         |            |                                |      |                |            |                                |      |                |
| Carve-out           | Ref        |                                |      |                | Ref        |                                |      |                |
| Fee-for-Service     | 1.07       | 0.88                           | 1.30 | 0.49           | 1.07       | 0.85                           | 1.34 | 0.58           |
| Integrated          | 1.23       | 0.95                           | 1.60 | 0.11           | 1.39       | 1.02                           | 1.91 | 0.04           |

**Demographics of Full Sample (Not Conditioning on Stimulant Use)**

|                                           | <b>Carve-out</b> | <b>Fee-for-service</b> | <b>Integrated</b> |
|-------------------------------------------|------------------|------------------------|-------------------|
| <b>Eligibility category (% of column)</b> |                  |                        |                   |
| Foster care                               | 5.5              | 3.9                    | 5.2               |
| SSI                                       | 3.8              | 6.8                    | 6.2               |
| TANF                                      | 90.7             | 89.3                   | 88.7              |
| <b>Sex</b>                                |                  |                        |                   |
| Male                                      | 49.9             | 50.9                   | 50.6              |
| <b>Age group (% of column)</b>            |                  |                        |                   |
| 3-5 years                                 | 22.9             | 27.5                   | 21.4              |
| 6-11 years                                | 37.8             | 38.7                   | 38.4              |
| 12-18 years                               | 39.3             | 33.8                   | 40.2              |
| <b>Race/ethnicity (% of column)</b>       |                  |                        |                   |
| White                                     | 14.6             | 24.8                   | 31.8              |
| Black                                     | 24.3             | 35.1                   | 58.9              |
| Latino                                    | 55.4             | 37.8                   | 6.4               |
| Other                                     | 5.6              | 2.3                    | 2.9               |
